# Supplementary material for: Conjunctival fibrosis and the innate barriers to Chlamydia trachomatis intracellular infection: a genome wide association study
Source: PubMed Central journal article supplement (PMC4663496; doi:10.1038/srep17447), 2015-11-30
Supplement: srep17447-s1.pdf [file srep17447-s1.pdf]

## Supplementary Materials

# Conjunctival fibrosis and the innate barriers to *Chlamydia trachomatis* intracellular infection: a genome wide association study

Chrissy h. Roberts<sup>1#\*</sup>, Christopher S Franklin<sup>2#</sup>, Pateh Makalo<sup>3</sup>, Hassan Joof<sup>3</sup>, Isatou Sarr<sup>3</sup>, Olaimatu S Mahdi<sup>3</sup>, Ansumana Sillah<sup>4</sup>, Momodou Bah<sup>5</sup>, Felicity Payne<sup>2</sup> Anna E Jeffreys<sup>7</sup>, William Bottomley<sup>2</sup>, Angels Natividad<sup>1</sup>, Sandra Molina-Gonzalez<sup>1</sup>, Sarah E Burr<sup>1,3</sup>, Mark Preston<sup>1</sup>, Dominic Kwiatkowski<sup>27</sup>, Kirk A Rockett<sup>7</sup>, Taane G Clark<sup>1</sup>, Matthew J Burton<sup>6</sup>, David CW Mabey<sup>1</sup>, Robin Bailey<sup>1</sup>, Inês Barroso<sup>2,8,9&</sup> and Martin J Holland<sup>1&</sup>

1. London School of Hygiene and Tropical Medicine, London, UK
2. Wellcome Trust Sanger Institute, Hinxton, UK
3. Medical Research Council Unit, The Gambia, Atlantic Boulevard, Fajara, The Gambia
4. National Eye Care Programme, Gambian Ministry of Health, Banjul, The Gambia
5. Sightsavers International, The Gambia. Kairaba Avenue, Banjul, The Gambia
6. International Centre for Eye Health, London, UK
7. Wellcome Trust Centre for Human Genetics, Oxford, UK
8. University of Cambridge Metabolic Research Laboratories, Wellcome Trust-MRC Institute of Metabolic Science, Cambridge, UK
9. NIHR Cambridge Biomedical Research Centre, Cambridge, UK

# and & : These authors contributed equally to the work

\* Corresponding author.

Mailing address :

Clinical Research Department, London School of Hygiene and Tropical Medicine, Keppel St. London, UK  
WC1E 7HT

Phone : +44 (0) 20 7927 2913

E-mail : [chrissy.roberts@lshtm.ac.uk](mailto:chrissy.roberts@lshtm.ac.uk)

Supplementary figure 1 : Quality control, base-calling, SNP and sample filtering and imputation.

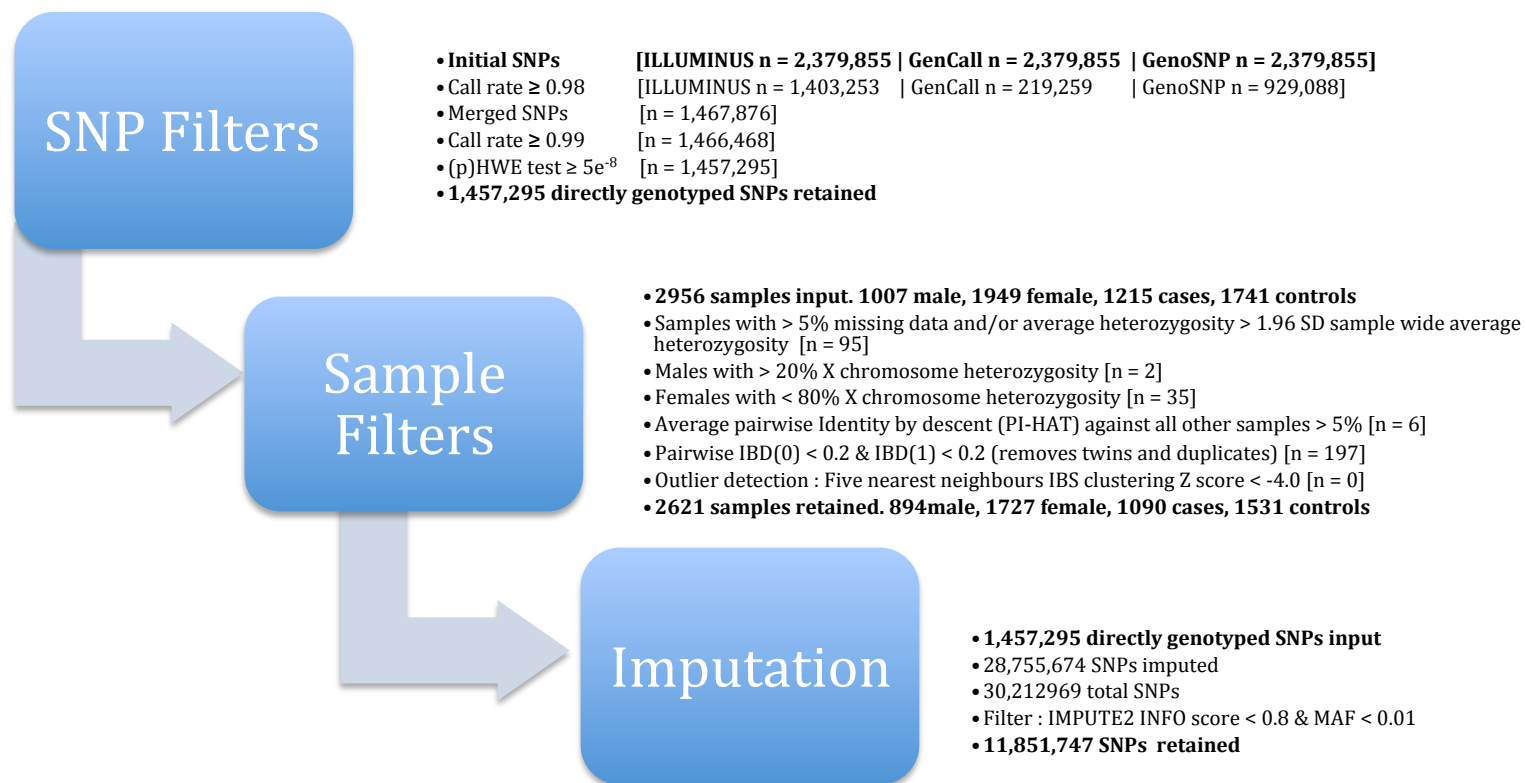

**Supplementary figure 2: Intersection of high call rate SNPs between three genotype-calling algorithms.**

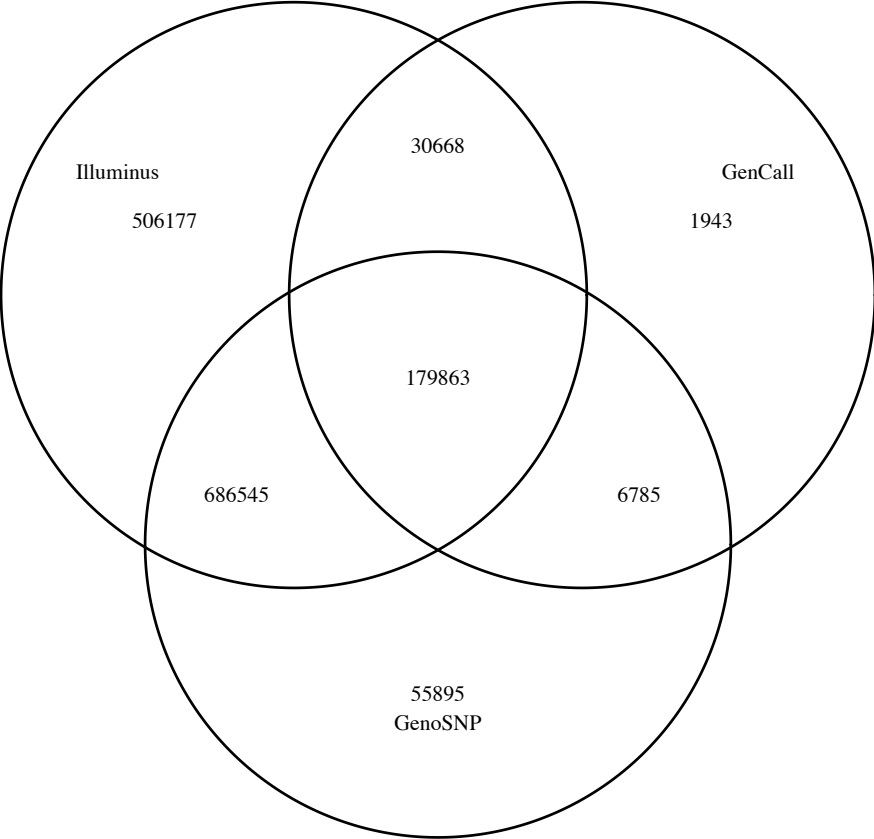

**Supplementary Figure 3. Principle Components Analysis using 1000G super-population references. (A) Principle components 1&2 and (B) Principle components 3&4.**

Population codes: AFR : African, AMR : Ad mixed American, ASN : East Asian, EUR : European and SAN : South Asian.

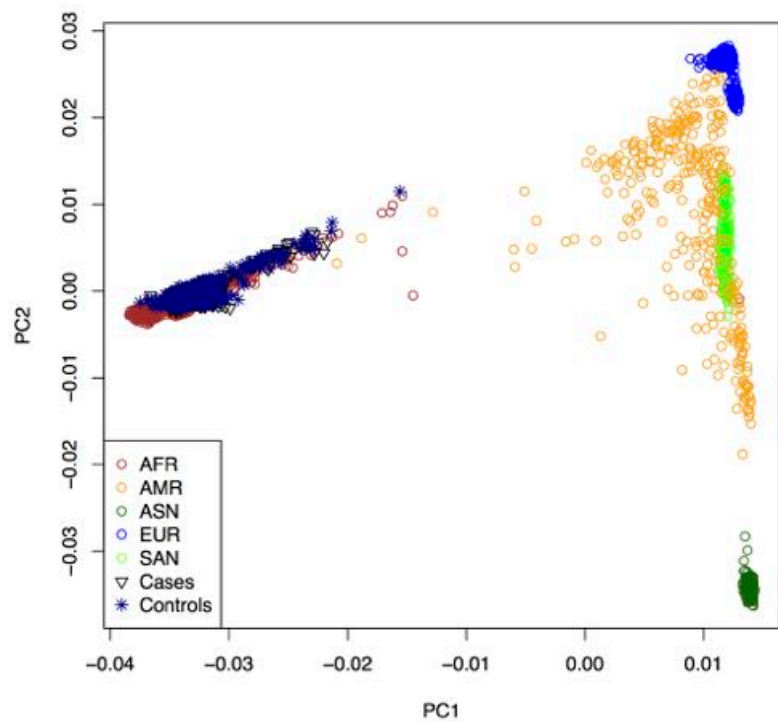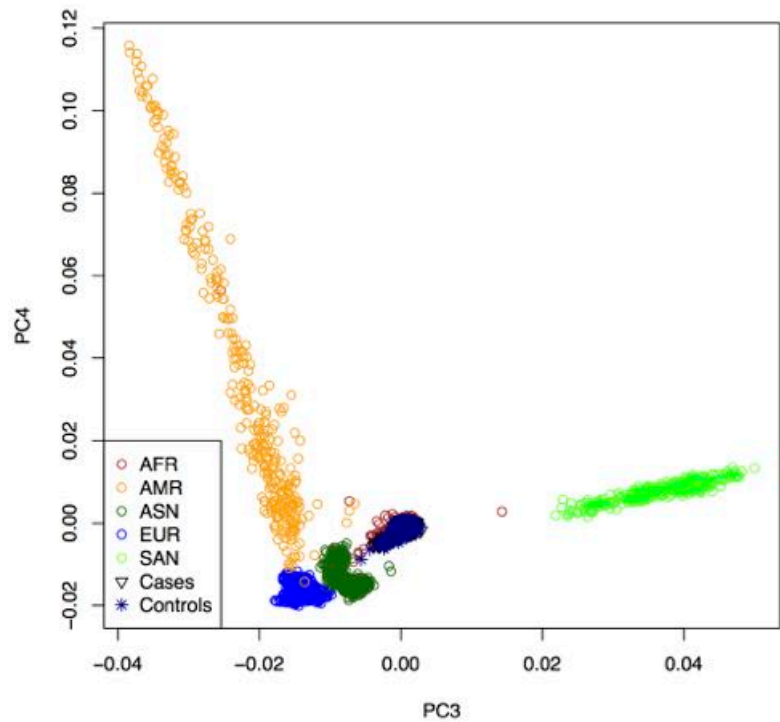

**Supplementary Figure 4. Principle Components Analysis using African reference populations. (A) Principle components 1&2 and (B) Principle components 3&4.**

ACB : African Carribean, ASW : African American in Southwest USA, ESN : Esan in Nigeria, GWD : Gambian in Western Division, LWK : Luhya in Webuye, Kenya, MSL : Mende in Sierra Leone and YRI : Yoruba in Ibadan, Nigeria.

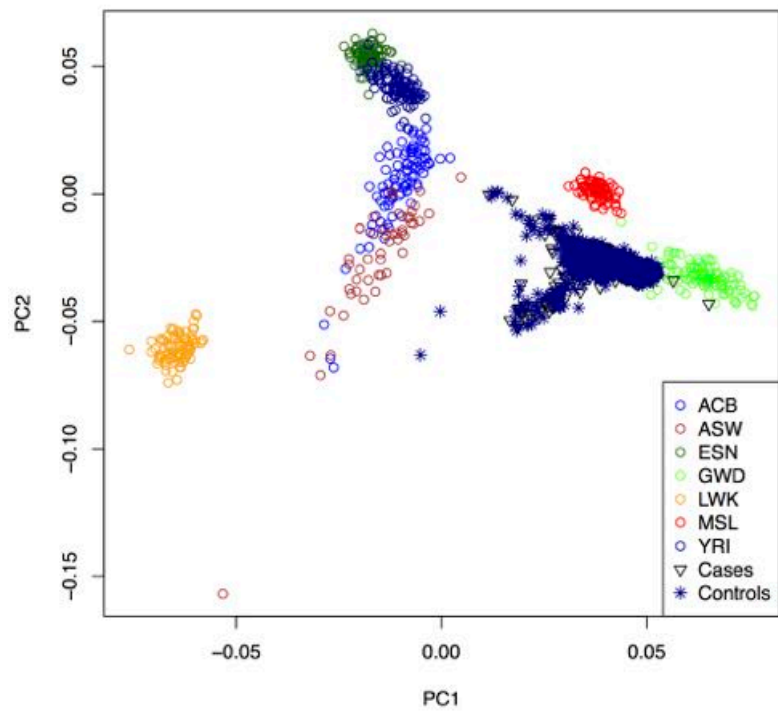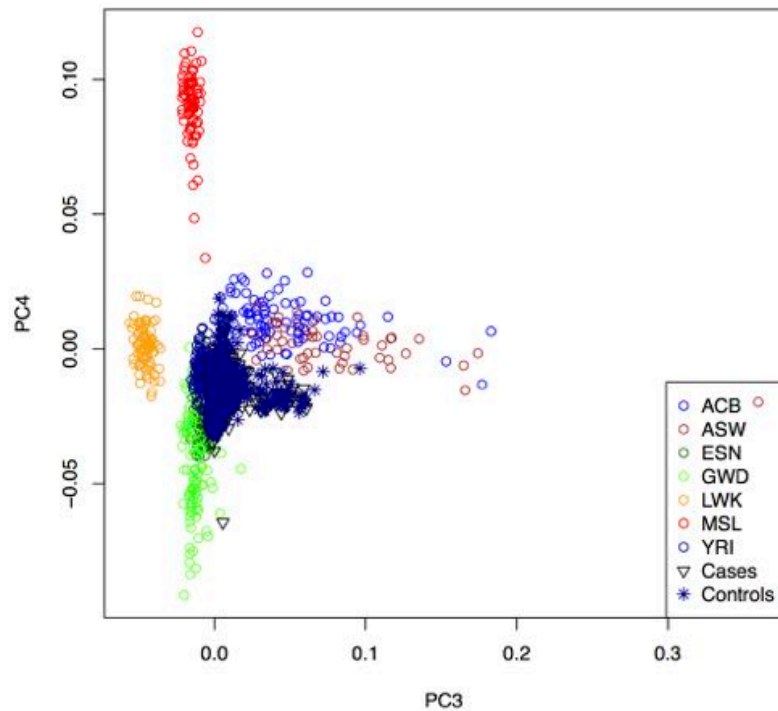

**Supplementary figure 5 : Pairwise estimates of proportion of alleles shared with IBD.**

Red : Duplicates and Twins, Yellow : Parent-Offspring pairs, Green : Full-siblings, Pink : Second degree relatives, Light blue : Third/fourth degree relatives, Purple : More distant relationships.  
Approximately  $2.5e^6$  pairs with  $IBD(0 \text{ alleles}) > 0.9$  are not shown.

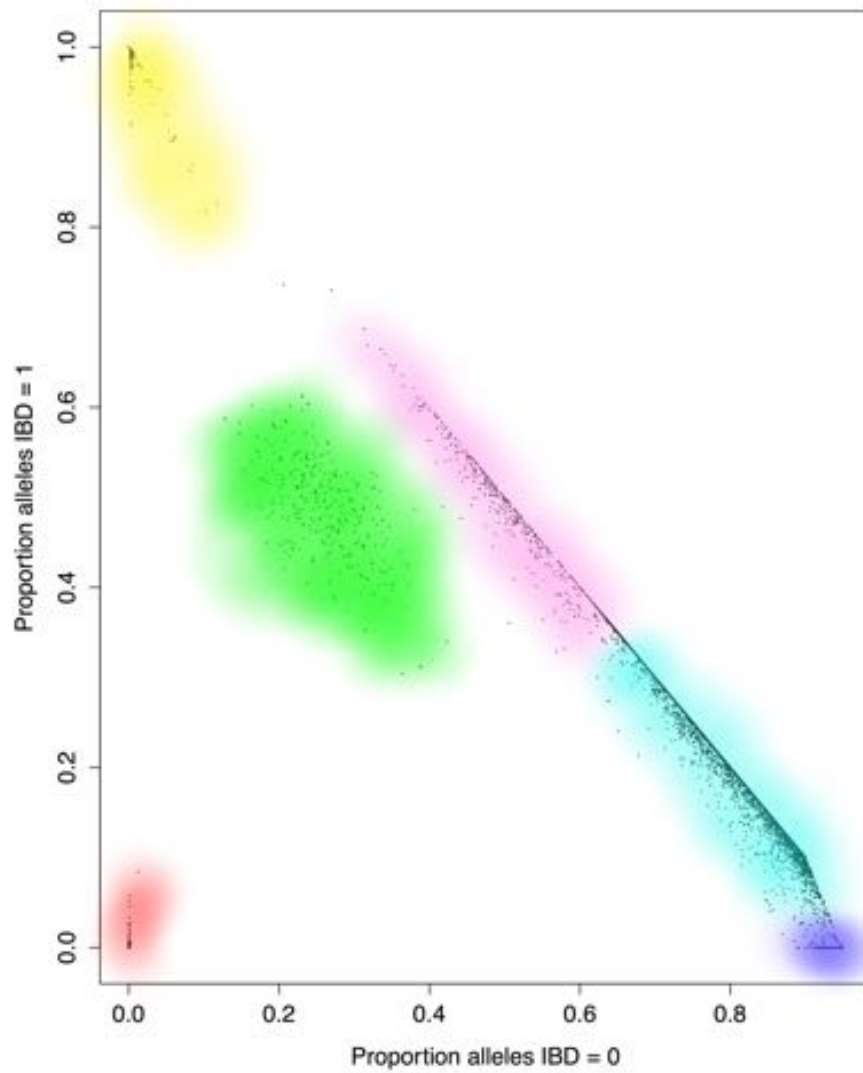

**Supplementary figure 6** : Regional Plots of 12 SNPs with  $P_{EMMAX} < 1 \times 10^{-6}$  and at least one SNP in region with  $R^2 > 0.6$ . Window size 250 kb. Dark red point is the SNP of interest. Pairwise LD of index SNP to other SNPs in region is indicated by coloration of points. LD structure was generated from imputed Gambian trachoma data.

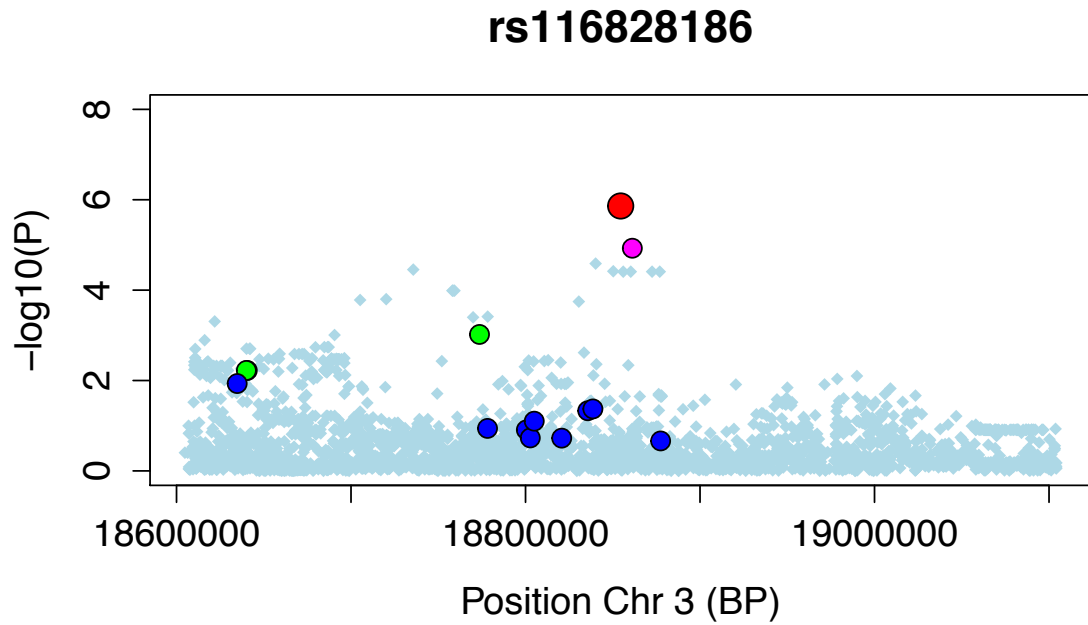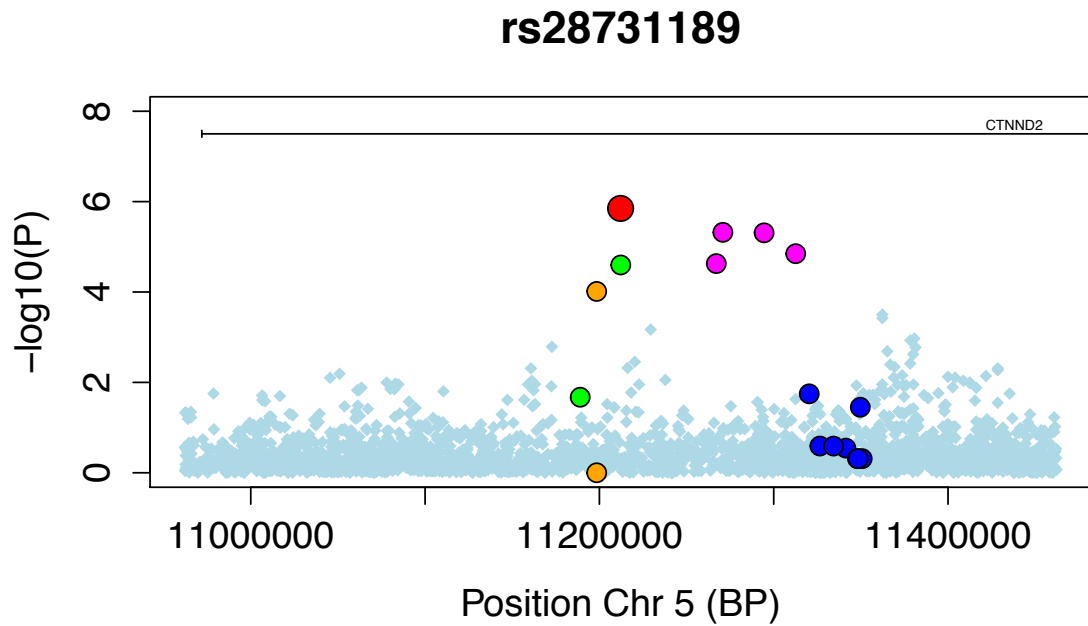

**rs74291850**

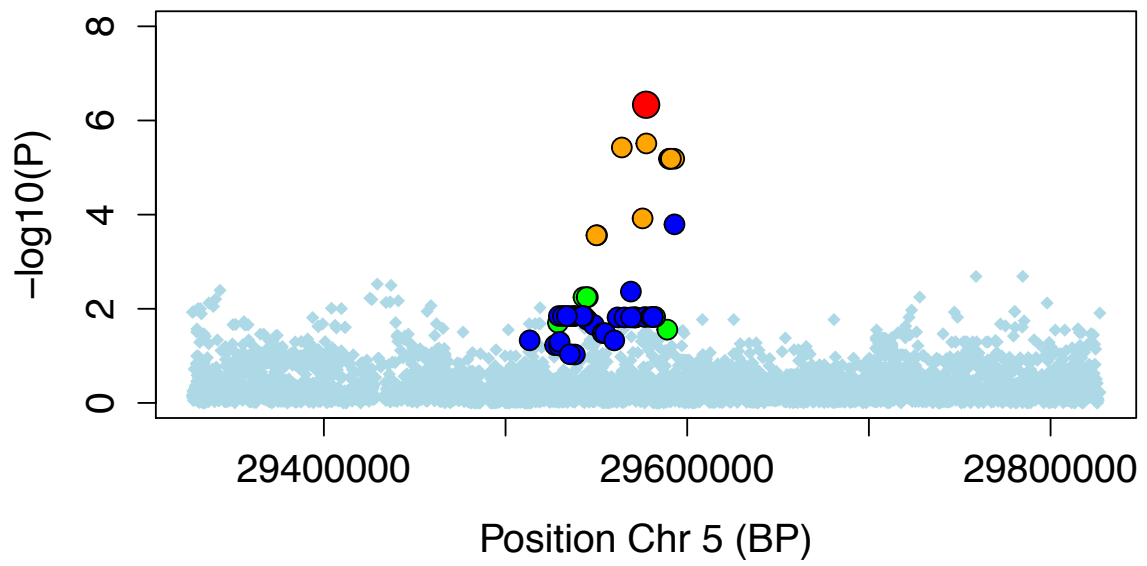

**rs187984259**

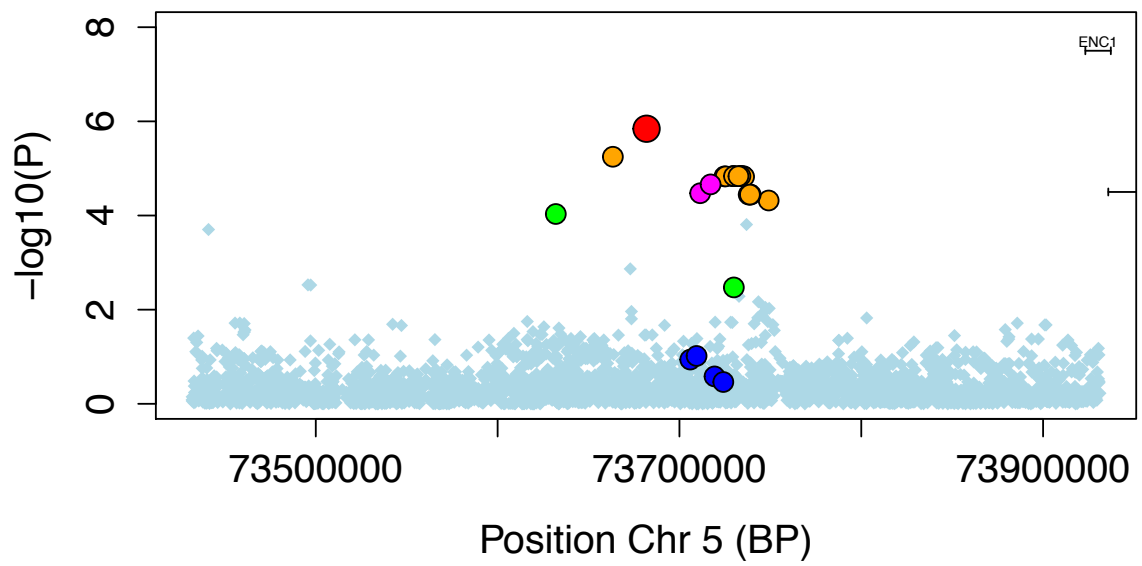



### rs80317841

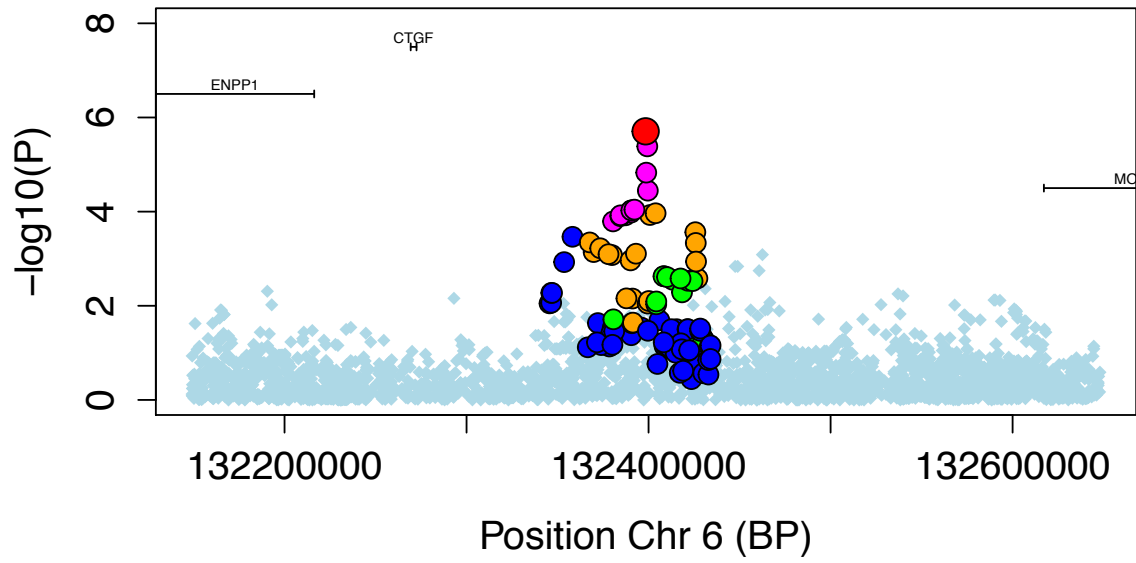

### rs116141145

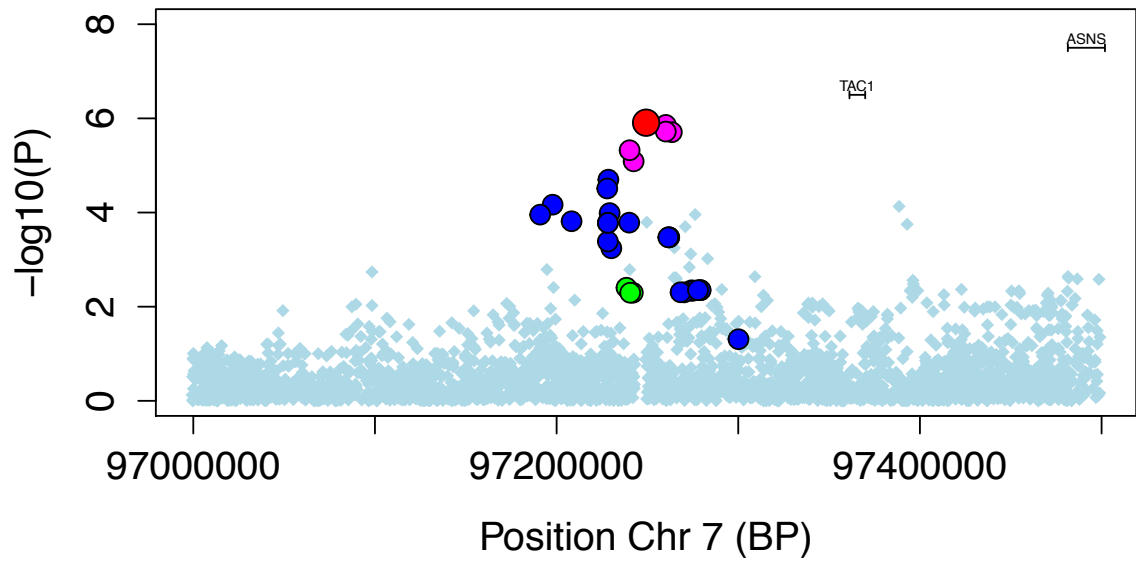

### rs111513399

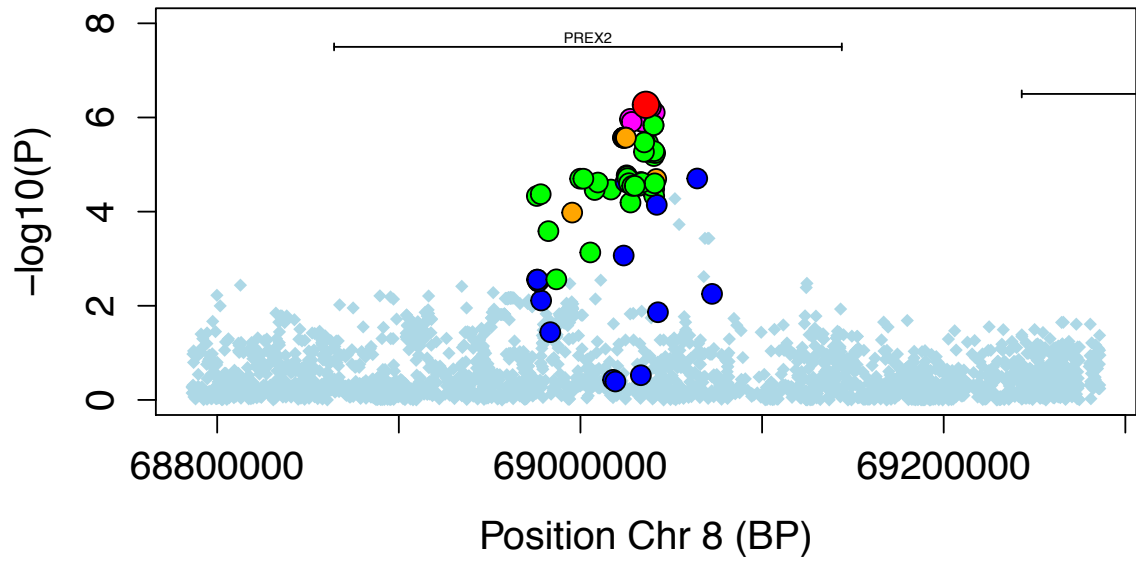

### rs11258313

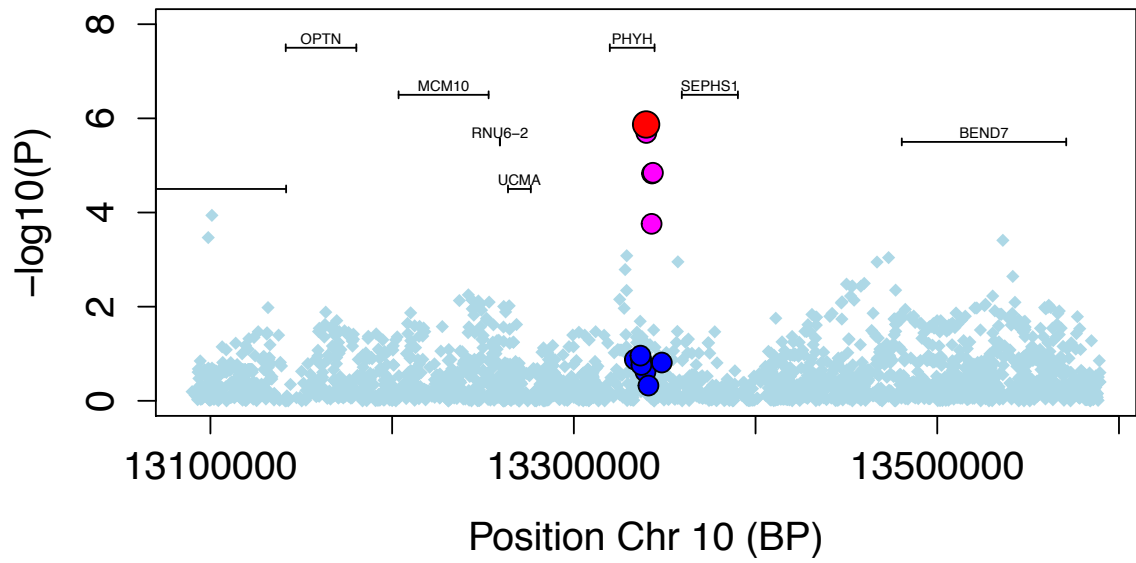

### rs12774519

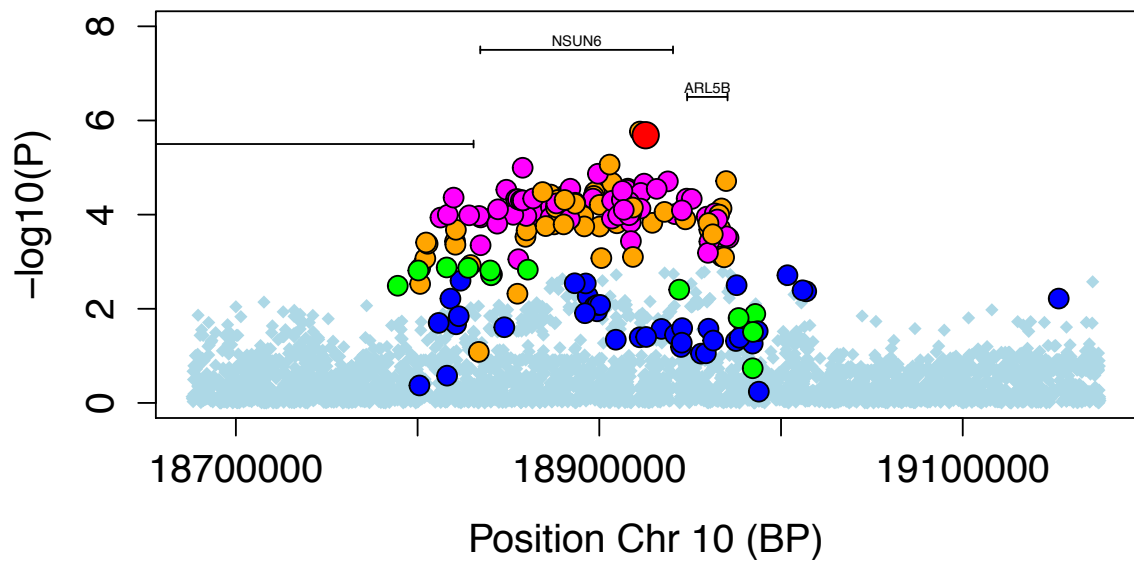

### rs9895748

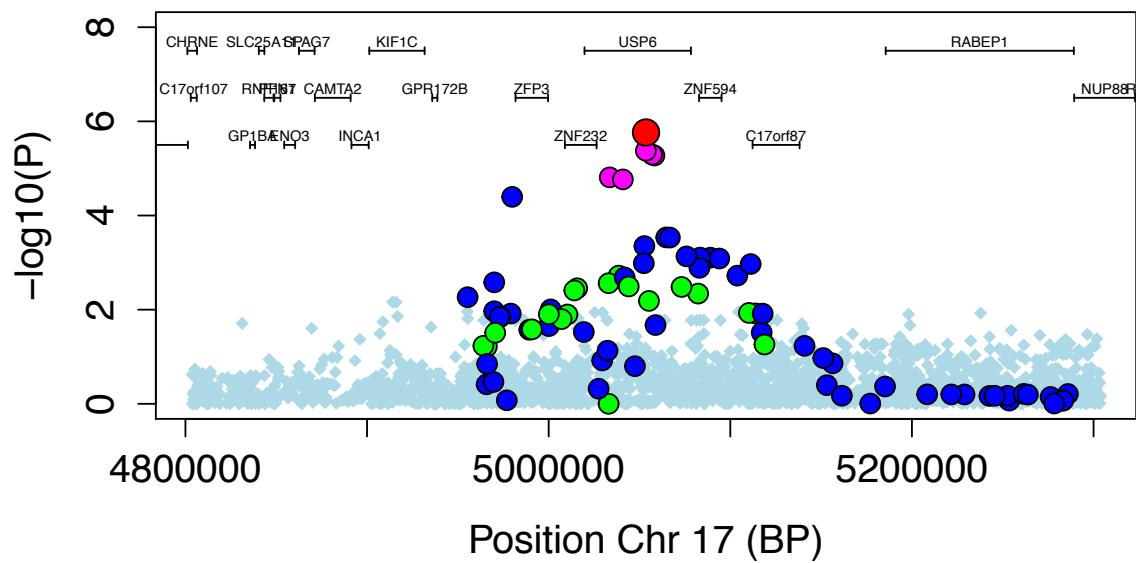

### rs62079945

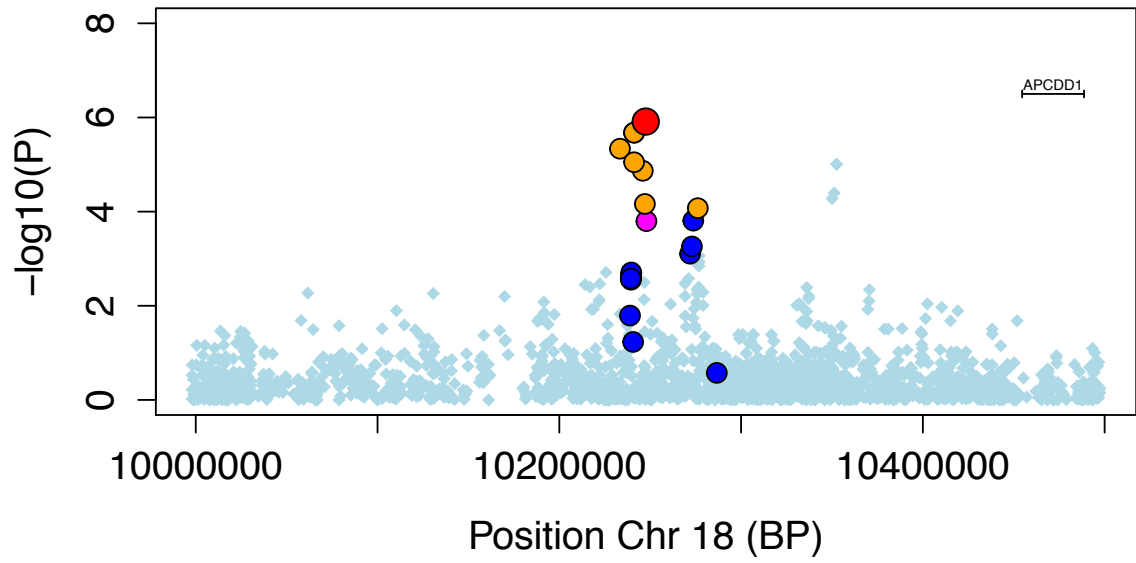

### rs6033064

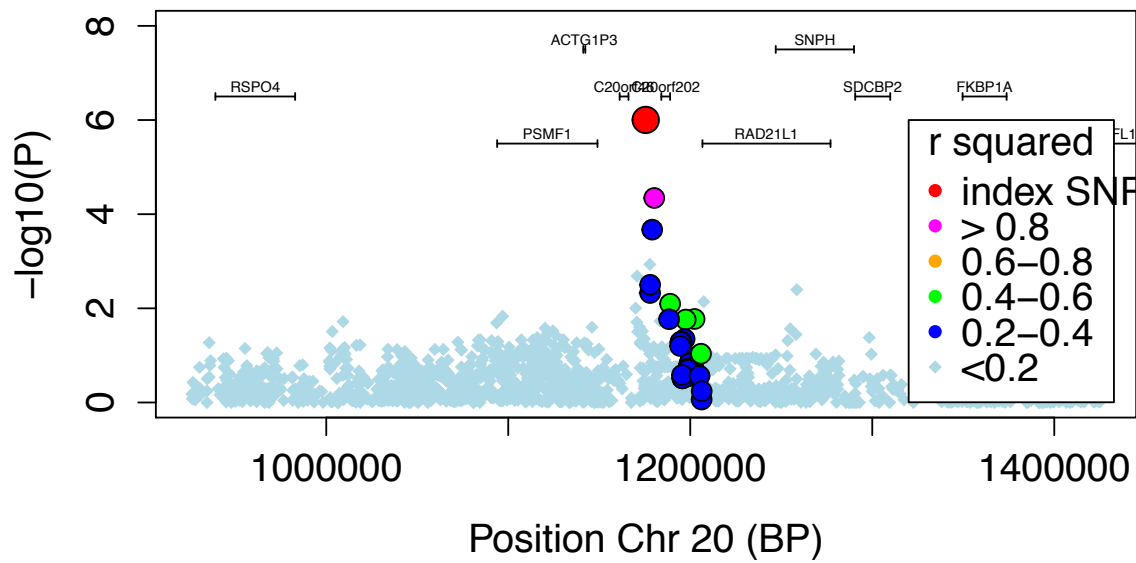

**Supplementary Figure 7 : Hierarchical clustering dendrogram of gene content overlaps between cross-validated pathways.**

Clusters with approximate unbiased alpha values greater than 90 are marked with red polygons. Clusters filled in green had at least one pathway that was significant in each of the two pathways analyses.



TABLES

Supplementary Table 1 : Complete list of SNPs with  $P_{EMMAX} < 5 \times 10^{-6}$

| SNP         | CHR | BP        | Allele1/2<br>(Effect allele<br>bold) |            | FREQ<br>EA | Type      | P                     | OR    | Gene     | Predicted function | Splice<br>Dist |
|-------------|-----|-----------|--------------------------------------|------------|------------|-----------|-----------------------|-------|----------|--------------------|----------------|
| rs140744181 | 2   | 125615326 | C                                    | <b>T</b>   | 0.061      | IMPUTED   | $4.91 \times 10^{-6}$ | 0.870 | CNTNAP5  | INTRONIC           | 7557           |
| rs58496359  | 3   | 3121314   | T                                    | <b>C</b>   | 0.054      | IMPUTED   | $2.63 \times 10^{-6}$ | 0.842 | IL5RA    | INTRONIC           | 3003           |
| rs116828186 | 3   | 18854524  | C                                    | <b>T</b>   | 0.027      | GENOTYPED | $1.37 \times 10^{-6}$ | 0.824 |          |                    |                |
| rs28731189  | 5   | 11212170  | C                                    | <b>T</b>   | 0.011      | IMPUTED   | $1.42 \times 10^{-6}$ | 0.736 | CTNND2   | INTRONIC           | 12397          |
| rs74291850  | 5   | 29577370  | T                                    | <b>C</b>   | 0.022      | IMPUTED   | $4.63 \times 10^{-7}$ | 1.291 |          |                    |                |
| rs187984259 | 5   | 73681906  | T                                    | <b>C</b>   | 0.016      | IMPUTED   | $1.43 \times 10^{-6}$ | 0.758 |          |                    |                |
| rs145595245 | 6   | 124070632 | C                                    | <b>A</b>   | 0.020      | IMPUTED   | $2.07 \times 10^{-6}$ | 1.313 |          |                    |                |
| rs80317841  | 6   | 132398394 | <b>G</b>                             | C          | 0.840      | GENOTYPED | $1.97 \times 10^{-6}$ | 1.092 |          |                    |                |
| rs73257509  | 6   | 165574984 | C                                    | <b>T</b>   | 0.167      | IMPUTED   | $3.76 \times 10^{-6}$ | 0.917 |          |                    |                |
| rs116141145 | 7   | 97249265  | A                                    | <b>G</b>   | 0.037      | IMPUTED   | $1.24 \times 10^{-6}$ | 1.190 |          |                    |                |
| rs114060470 | 7   | 97260121  | G                                    | <b>A</b>   | 0.036      | IMPUTED   | $1.37 \times 10^{-6}$ | 1.205 |          |                    |                |
| rs1403864   | 7   | 118237253 | <b>A</b>                             | C          | 0.624      | IMPUTED   | $4.66 \times 10^{-6}$ | 1.075 |          |                    |                |
| rs111513399 | 8   | 69036056  | A                                    | <b>S</b>   | 0.113      | IMPUTED   | $5.38 \times 10^{-7}$ | 1.114 | PREX2    | INTRONIC           | 2772           |
| rs10809114  | 9   | 10532173  | C                                    | <b>T</b>   | 0.064      | IMPUTED   | $2.88 \times 10^{-6}$ | 0.880 | PTPRD    | INTRONIC           | 80225          |
| rs11258313  | 10  | 13339766  | G                                    | <b>A</b>   | 0.233      | IMPUTED   | $1.35 \times 10^{-6}$ | 1.101 | PHYH     | INTRONIC           | 421            |
| rs201134023 | 10  | 18922338  | -                                    | <b>ACA</b> | 0.216      | IMPUTED   | $1.72 \times 10^{-6}$ | 1.081 | NSUN6    | INTRONIC           | 9067           |
| rs11614525  | 12  | 97692730  | A                                    | <b>T</b>   | 0.042      | IMPUTED   | $2.70 \times 10^{-6}$ | 1.190 |          |                    |                |
| rs2173866   | 12  | 101950920 | <b>C</b>                             | G          | 0.716      | IMPUTED   | $3.60 \times 10^{-6}$ | 0.932 |          |                    |                |
| rs116221519 | 13  | 22312484  | G                                    | <b>A</b>   | 0.038      | IMPUTED   | $3.73 \times 10^{-6}$ | 1.191 |          |                    | 137271         |
| rs34333926  | 13  | 94017140  | C                                    | <b>T</b>   | 0.011      | IMPUTED   | $2.74 \times 10^{-6}$ | 0.677 | GPC6     | INTRONIC           |                |
| rs142646255 | 15  | 58034533  | GAG                                  | -          | 0.031      | IMPUTED   | $3.91 \times 10^{-6}$ | 0.811 |          |                    | 4136           |
| rs1531683   | 15  | 84679158  | <b>T</b>                             | C          | 0.711      | GENOTYPED | $4.23 \times 10^{-6}$ | 0.934 | ADAMTSL3 | INTRONIC           | 1536           |
| rs9895748   | 17  | 5053598   | T                                    | <b>A</b>   | 0.068      | IMPUTED   | $1.72 \times 10^{-6}$ | 0.872 | USP6     | INTRONIC           |                |
| rs62079945  | 18  | 10247566  | A                                    | <b>C</b>   | 0.048      | IMPUTED   | $1.22 \times 10^{-6}$ | 0.842 |          |                    |                |
| rs6033064   | 20  | 1175527   | <b>T</b>                             | C          | 0.803      | IMPUTED   | $9.94 \times 10^{-7}$ | 0.909 |          |                    |                |
| rs1487321   | 20  | 44235865  | T                                    | <b>G</b>   | 0.391      | IMPUTED   | $3.38 \times 10^{-6}$ | 1.070 | WFDC9    | 3' DOWNSTREAM      |                |
| rs147707056 | 21  | 16582162  | A                                    | <b>T</b>   | 0.014      | IMPUTED   | $3.19 \times 10^{-6}$ | 0.726 |          |                    |                |

\*Expected frequency of the effect allele

\*\*The OR indicates the estimated allele frequency odds ratio for the effect allele. Values less than one indicate that the effect allele is less common in cases than controls and vice versa.

**Supplementary Table 2 : Potential roles for GWAS tagged candidate genes in Chlamydia mediated pathology**

| Gene          | Supporting Evidence                                                                                                                                                                                                                                   | Potential Role in Ct pathology                                                                                                                             | REF       |
|---------------|-------------------------------------------------------------------------------------------------------------------------------------------------------------------------------------------------------------------------------------------------------|------------------------------------------------------------------------------------------------------------------------------------------------------------|-----------|
| PREX2         | <ul style="list-style-type: none"> <li>• GNEFs Sos1 and Vav2 interact with Chlamydial TARP, PI3K and Rac</li> <li>• PREX2 has similarity to Sos1 and Vav2 and is known to interact with Rac and the PI3K inhibitor PTEN</li> </ul>                    | <ul style="list-style-type: none"> <li>• TARP mediated Ct entry</li> <li>• Additional role for PREX2 in glucose homeostasis</li> </ul>                     | 1<br>2    |
| <i>PHYH</i>   | <ul style="list-style-type: none"> <li>• PHYH oxidises branched-chain fatty acids in the peroxisome</li> </ul>                                                                                                                                        | <ul style="list-style-type: none"> <li>• Limiting lipid supply to inclusion</li> </ul>                                                                     | 3-6       |
| <i>USP6</i>   | <ul style="list-style-type: none"> <li>• NF-κB activation</li> <li>• ERK, MAPK and MyD88 signalling. Control of cell motility and cytokinesis</li> </ul>                                                                                              | <ul style="list-style-type: none"> <li>• NF-κB activation, stimulation of MMP9</li> <li>• Control of cell cycle arrest and limiting cytokinesis</li> </ul> | 7-9<br>10 |
| <i>CTNND2</i> | <ul style="list-style-type: none"> <li>• Another catenin (beta) is involved in cell cycle regulation and has been shown to be sequestered to the cytoplasmic inclusion during infection</li> <li>• Beta catenin involved in Wnt signalling</li> </ul> | <ul style="list-style-type: none"> <li>• Disruption of cell-cell junctions</li> <li>• Cell cycle arrest</li> </ul>                                         | 11<br>12  |
| NSUN6         | <ul style="list-style-type: none"> <li>• A paralogue of the <i>NOP2</i> gene and a regulator of cell proliferation</li> </ul>                                                                                                                         | <ul style="list-style-type: none"> <li>• Cell cycle arrest</li> </ul>                                                                                      | 13        |



**Supplementary Table 3 : Potential roles for pathways-wide GO terms in Chlamydia mediated pathology**

| GO                                                    | Supporting Evidence                                                                                                                                                                                                                                                                                                                                                                                                                                                                                                                        | Potential Role in Ct pathology                                                                                                                                                                                                                                                                     | REF                    |
|-------------------------------------------------------|--------------------------------------------------------------------------------------------------------------------------------------------------------------------------------------------------------------------------------------------------------------------------------------------------------------------------------------------------------------------------------------------------------------------------------------------------------------------------------------------------------------------------------------------|----------------------------------------------------------------------------------------------------------------------------------------------------------------------------------------------------------------------------------------------------------------------------------------------------|------------------------|
| Microtubule-based Process                             | <ul style="list-style-type: none"> <li>• Ct causes mitotic spindle pole defects</li> <li>• Association of Ct with the centrosome</li> </ul>                                                                                                                                                                                                                                                                                                                                                                                                | <ul style="list-style-type: none"> <li>• Establishment of the parasitic niche</li> </ul>                                                                                                                                                                                                           | 14,15                  |
| G-protein coupled Receptor protein signalling pathway | <ul style="list-style-type: none"> <li>• Involvement of GNEFs in TARP mediated cellular entry by the elementary body</li> </ul>                                                                                                                                                                                                                                                                                                                                                                                                            | <ul style="list-style-type: none"> <li>• Initiation of invasion, cytoskeletal reorganisation and downstream cell cycle control</li> <li>• Association with <i>C. muridarum</i> infection related upper genital tract disease severity</li> </ul>                                                   | 1<br>16                |
| Cellular response to hormone stimulus                 | <ul style="list-style-type: none"> <li>• Close relationship to G-protein signalling</li> <li>• Hormone receptors shown to aid chlamydial entry</li> <li>• <i>C. pneumoniae</i> protein Cpn0712 down-regulates glucagon-Like-Peptide Receptor 2</li> <li>• Direct roles for Glucagon-like-Peptide 1 in fibrosis</li> </ul>                                                                                                                                                                                                                  | <ul style="list-style-type: none"> <li>• Enhance binding and entry of Ct, potentially via GLP1R or ILGFR</li> <li>• Link to PI3K/Akt/p53, apoptosis and glucose homeostasis</li> <li>• Possible pathway towards scarring</li> </ul>                                                                | 17-20                  |
| Cell surface receptor linked signal transduction      | <ul style="list-style-type: none"> <li>• GNEFs in TARP mediated cellular</li> <li>• FGF receptors directly bind EBs during infection</li> <li>• FGF2 potentially acts as a bridging molecule to directly facilitate the binding of elementary bodies</li> </ul>                                                                                                                                                                                                                                                                            | <ul style="list-style-type: none"> <li>• Downstream signalling targets cell cycle</li> <li>• Increased binding to host cells during the initial phase of infection</li> </ul>                                                                                                                      | 1,21                   |
| Cell Cycle                                            | <ul style="list-style-type: none"> <li>• p53 degradation releases G6PD activity. Diversion of glycolysis substrates to the pentose phosphate pathway.</li> <li>• Ct derived CPAF acts as an anaphase promoting factor by cleaving cyclin B2 and securin</li> <li>• CPAF degrades p53</li> <li>• miR-1285, upregulated in TS, inhibits p53</li> <li>• Ct modifies cyclin dependent kinase (CDK) activity</li> <li>• Ct disrupts cytokinesis, overrides mitotic spindle checkpoint and induces early progression through mitosis.</li> </ul> | <ul style="list-style-type: none"> <li>• Enhanced energy, nucleotide and amino acid harvesting to inclusion from cytoplasm</li> <li>• Cell cycle control</li> <li>• control of G6PD, cell cycle and NF-κB</li> <li>• CDK family members are implicated in fibrotic responses</li> <li>•</li> </ul> | 22-28,15               |
| Regulation of T cell activation                       | <ul style="list-style-type: none"> <li>• CD4 and CD8 T cells involved in both protection and pathology</li> </ul>                                                                                                                                                                                                                                                                                                                                                                                                                          | <ul style="list-style-type: none"> <li>• IFN-G response leading to pathology</li> </ul>                                                                                                                                                                                                            | reviewed <sup>29</sup> |
| Sodium Ion Transport                                  | <ul style="list-style-type: none"> <li>• Ct manipulates Na<sup>+</sup> homeostasis leading to cytoplasmic pH change and cell cycle changes</li> </ul>                                                                                                                                                                                                                                                                                                                                                                                      | <ul style="list-style-type: none"> <li>• May mediate appropriate energy and metabolism control in reticulate bodies</li> </ul>                                                                                                                                                                     | reviewed <sup>30</sup> |
| Phosphorous metabolic process                         | <ul style="list-style-type: none"> <li>• Non-significant GO term</li> <li>• This term is a proxy for prophase and golgi stack organisation</li> </ul>                                                                                                                                                                                                                                                                                                                                                                                      | <ul style="list-style-type: none"> <li>• Ct disrupts the golgi apparatus and causes golgi ministacks to form in proximity to inclusion, aiding reproduction</li> </ul>                                                                                                                             | 31                     |
| Regulation of phosphorylation                         | <ul style="list-style-type: none"> <li>• Includes pathways of T cell immunity and extracellular matrix and platelet activation</li> </ul>                                                                                                                                                                                                                                                                                                                                                                                                  | <ul style="list-style-type: none"> <li>• CD24, CTLA4, Glycoprotein IV</li> <li>• Scarring and immune response</li> </ul>                                                                                                                                                                           |                        |

**Supplementary Table 4. Summary statistics for ALIGATOR analysis.**

The number of significant pathways at  $p \leq 0.01$  and  $p \leq 0.05$ , given 1,345 pathways and cutoff values of either 0.01, 0.001 or 0.0001 are given.

|                                |               | Threshold value* |       |        | Expected** |
|--------------------------------|---------------|------------------|-------|--------|------------|
|                                |               | 0.01             | 0.001 | 0.0001 |            |
| Number of significant pathways | $P \leq 0.01$ | 9                | 51    | 18     | 13.45      |
|                                | $P \leq 0.05$ | 50               | 103   | 39     | 67.25      |

\* Threshold value refers to ALIGATOR snp.pcut argument in R SNPPath package

\*\* number of pathways expected to return the specified p value by chance alone, after 100 permutations and given 1345 possible pathways

## **METHODS**

### **Tests for population stratification**

The directly genotyped SNP data and the 1000 genomes reference data<sup>31</sup> were filtered to obtain a subset of variants with  $MAF \geq 0.01$  and HWE  $p$ -value  $> 1 \times 10^{-5}$  in both datasets. The remaining SNPs were then pruned for LD independence in the dataset with a sliding window of 500 SNPs and a maximum  $r^2$  LD value of 0.2. The final set of SNPs was used to calculate ethnic ancestry Principle Components Analysis axis first on a global scale using all 1000 genomes populations and subsequently on an a continental scale using only populations with predominantly African ancestry. Results of this analysis can be seen in supplementary figures 3 and 4.

### **Pathways analysis**

ALIGATOR counts the number of genes in a pathway that contain a SNP with a  $P_{EMMAX}$  value more extreme than a pre-specified threshold value and then determines the significance of pathways in permutation tests. The signal to noise ratio of the test can be controlled by calibration of the  $P$  threshold value that is considered nominally significant. The ALIGATOR literature recommends exploring the effects of utilising a number of different thresholds. Threshold values that return a greater number of significant pathways than the number of pathways expected to be significant by chance alone at  $P < 0.01$  and  $P < 0.05$  is predictable (given 1345 pathways) as respectively 13.45 and 67.25. An optimal threshold for pathways discovery might be one that returns more significant pathways than would be expected by chance alone. In this study, the effects of using threshold values of 0.01, 0.001 and 0.0001 were explored. Using a threshold value of 0.01 led to fewer significant pathways than would be expected by chance (Supplementary table 1), suggesting that this cut-off was too relaxed. Threshold values of 0.001 and 0.0001 both obtained more significant pathways than expected,

with a peak at 0.001 (Supplementary table 1), which was then used in the main analysis.

The high number of SNPs involved, combined with a high number of permutations, makes this process computationally intensive and a relatively modest number ( $n = 100$ ) of re-samplings were initially used to pre-screen the pathways. Candidate pathways for fine ALIGATOR analysis were those with  $p < 0.05$  in the initial screening. Candidate pathways were then tested again by ALIGATOR using 100,000 permutations of the phenotypes.

For each pathway in PODA analysis, a score “S” is determined for each individual’s sample. This score describes the genetic distance of the current sample from other cases relative to its distance from controls. The distributions of these scores in cases and controls are then compared to obtain the pathway Distinction Score ‘DS’. DS is normalised by resampling with randomisation of the phenotypes and is tested for significance by an implementation of the permutation test where a set of arbitrary pathways of equal length to the pathway of interest are tested for association with the phenotype with resampling of phenotypes. The DS<sub>p</sub> is a confidence measure that is analogous to a standard p-value and that describes the proportion of permutations in which the DS value was larger in the simulated pathway than in the true pathway. The reported Odds Ratio (OR) for the pathway describes the increase in relative odds of disease given each unit increase in S. For each pathway we implemented 100 re-samplings and 1000 permutations of the test.
